# Supplementary material
Source: Springer Nature journal article supplement (https://www.springermedizin.de/resource/supplementary/13058_2008_2078_MOESM1_ESM.pdf/9700586)
Supplement: MOESM1 [file 9700586]

**Table 4. ADRB2, ADRB3, GHRL, IRS1, and SHC1 SNP associations with breast cancer**

| SNP          | Alleles    | Cases | Controls | Matching Adjusted <sup>1</sup> |             |                      | Multivariate Adjusted <sup>2</sup> |             |                      |
|--------------|------------|-------|----------|--------------------------------|-------------|----------------------|------------------------------------|-------------|----------------------|
|              |            |       |          | Odds Ratio                     | 95% CI      | p-value <sup>3</sup> | Odds Ratio                         | 95% CI      | p-value <sup>3</sup> |
| <i>ADRB2</i> | rs877741   |       |          |                                |             |                      |                                    |             |                      |
|              | T/T        | 425   | 423      | 1.00                           | (-)         |                      | 1.00                               | (-)         |                      |
|              | T/C        | 199   | 208      | 0.94                           | (0.74-1.19) |                      | 0.91                               | (0.71-1.16) |                      |
|              | C/C        | 20    | 20       | 1.00                           | (0.52-1.91) | 0.69                 | 1.00                               | (0.51-1.94) | 0.56                 |
|              | T/C or C/C | 219   | 228      | 0.95                           | (0.75-1.19) | 0.64                 | 0.92                               | (0.73-1.16) | 0.49                 |
|              | rs2400707  |       |          |                                |             |                      |                                    |             |                      |
|              | G/G        | 178   | 197      | 1.00                           | (-)         |                      | 1.00                               | (-)         |                      |
|              | G/A        | 322   | 293      | 1.21                           | (0.94-1.57) |                      | 1.20                               | (0.92-1.56) |                      |
|              | A/A        | 122   | 146      | 0.92                           | (0.67-1.27) | 0.80                 | 0.93                               | (0.67-1.28) | 0.83                 |
|              | G/A or A/A | 444   | 439      | 1.12                           | (0.88-1.42) | 0.37                 | 1.11                               | (0.87-1.42) | 0.40                 |
|              | rs1042718  |       |          |                                |             |                      |                                    |             |                      |
|              | C/C        | 454   | 459      | 1.00                           | (-)         |                      | 1.00                               | (-)         |                      |
| C/A          | 173        | 175   | 1.00     | (0.78-1.28)                    |             | 0.98                 | (0.76-1.26)                        |             |                      |
| A/A          | 13         | 17    | 0.80     | (0.38-1.66)                    | 0.75        | 0.89                 | (0.42-1.88)                        | 0.76        |                      |
| C/A or A/A   | 186        | 192   | 0.98     | (0.77-1.25)                    | 0.88        | 0.97                 | (0.76-1.24)                        | 0.81        |                      |
| rs17108817   |            |       |          |                                |             |                      |                                    |             |                      |
| C/C          | 164        | 163   | 1.00     | (-)                            |             | 1.00                 | (-)                                |             |                      |
| C/T          | 309        | 331   | 0.93     | (0.72-1.22)                    |             | 0.92                 | (0.70-1.20)                        |             |                      |
| T/T          | 160        | 154   | 1.03     | (0.75-1.40)                    | 0.88        | 1.03                 | (0.75-1.41)                        | 0.88        |                      |
| C/T or T/T   | 469        | 485   | 0.96     | (0.75-1.24)                    | 0.78        | 0.95                 | (0.73-1.23)                        | 0.70        |                      |
| <i>ADRB3</i> | rs4994     |       |          |                                |             |                      |                                    |             |                      |
|              | T/T        | 534   | 553      | 1.00                           | (-)         |                      | 1.00                               | (-)         |                      |
|              | T/C        | 103   | 86       | 1.24                           | (0.91-1.69) |                      | 1.25                               | (0.91-1.72) |                      |
|              | C/C        | 5     | 6        | 0.89                           | (0.27-2.92) | 0.26                 | 0.97                               | (0.28-3.31) | 0.23                 |
| T/C or C/C   | 108        | 92    | 1.22     | (0.90-1.65)                    | 0.20        | 1.23                 | (0.91-1.68)                        | 0.19        |                      |
| <i>GHRL</i>  | rs2075355  |       |          |                                |             |                      |                                    |             |                      |
|              | G/G        | 301   | 288      | 1.00                           | (-)         |                      | 1.00                               | (-)         |                      |
|              | G/A        | 283   | 273      | 1.00                           | (0.79-1.27) |                      | 1.04                               | (0.82-1.32) |                      |
|              | A/A        | 52    | 82       | 0.60                           | (0.41-0.88) | 0.06                 | 0.63                               | (0.42-0.93) | 0.12                 |
|              | G/A or A/A | 335   | 355      | 0.91                           | (0.73-1.13) | 0.40                 | 0.94                               | (0.75-1.18) | 0.61                 |
|              | rs171336   |       |          |                                |             |                      |                                    |             |                      |
|              | G/G        | 235   | 263      | 1.00                           | (-)         |                      | 1.00                               | (-)         |                      |
|              | G/T        | 315   | 270      | 1.30                           | (1.02-1.66) |                      | 1.26                               | (0.98-1.61) |                      |
|              | T/T        | 75    | 101      | 0.82                           | (0.58-1.17) | 0.96                 | 0.75                               | (0.53-1.07) | 0.56                 |
|              | G/T or T/T | 390   | 371      | 1.17                           | (0.93-1.47) | 0.17                 | 1.12                               | (0.89-1.41) | 0.35                 |
| rs35683      |            |       |          |                                |             |                      |                                    |             |                      |
| C/C          | 146        | 188   | 1.00     | (-)                            |             | 1.00                 | (-)                                |             |                      |
| C/A          | 342        | 296   | 1.51     | (1.16-1.97)                    |             | 1.44                 | (1.10-1.90)                        |             |                      |
| A/A          | 135        | 152   | 1.15     | (0.84-1.59)                    | 0.29        | 1.05                 | (0.76-1.46)                        | 0.64        |                      |
| C/A or A/A   | 477        | 448   | 1.39     | (1.08-1.79)                    | 0.01        | 1.31                 | (1.01-1.70)                        | 0.04        |                      |

**Table 4. (continued)**

| SNP                    | Alleles    | Cases | Controls | Matching Adjusted <sup>1</sup> |             |                      | Multivariate Adjusted <sup>2</sup> |             |                      |
|------------------------|------------|-------|----------|--------------------------------|-------------|----------------------|------------------------------------|-------------|----------------------|
|                        |            |       |          | Odds Ratio                     | 95% CI      | p-value <sup>3</sup> | Odds Ratio                         | 95% CI      | p-value <sup>3</sup> |
| <i>GHRL</i><br>(cont.) | rs4684677  |       |          |                                |             |                      |                                    |             |                      |
|                        | T/T        | 568   | 576      | 1.00                           | (-)         |                      | 1.00                               | (-)         |                      |
|                        | T/A        | 62    | 71       | 0.88                           | (0.61-1.26) |                      | 0.89                               | (0.61-1.28) |                      |
|                        | A/A        | 4     | 0        | -                              | (*-*)       | 0.95                 | -                                  | (*-*)       | 0.96                 |
|                        | T/A or A/A | 66    | 71       | 0.93                           | (0.65-1.33) | 0.69                 | 0.94                               | (0.66-1.36) | 0.76                 |
|                        | rs2075356  |       |          |                                |             |                      |                                    |             |                      |
|                        | T/T        | 531   | 532      | 1.00                           | (-)         |                      | 1.00                               | (-)         |                      |
|                        | T/C        | 104   | 113      | 0.93                           | (0.69-1.24) |                      | 0.97                               | (0.72-1.30) |                      |
|                        | C/C        | 5     | 7        | 0.72                           | (0.23-2.30) | 0.49                 | 0.77                               | (0.24-2.50) | 0.70                 |
|                        | T/C or C/C | 109   | 120      | 0.91                           | (0.69-1.22) | 0.54                 | 0.96                               | (0.71-1.28) | 0.76                 |
| rs42451                |            |       |          |                                |             |                      |                                    |             |                      |
| C/C                    | 342        | 344   | 1.00     | (-)                            |             | 1.00                 | (-)                                |             |                      |
| C/T                    | 264        | 252   | 1.06     | (0.84-1.33)                    |             | 1.09                 | (0.86-1.38)                        |             |                      |
| T/T                    | 36         | 55    | 0.65     | (0.41-1.02)                    | 0.34        | 0.65                 | (0.41-1.02)                        | 0.43        |                      |
| C/T or T/T             | 300        | 307   | 0.99     | (0.79-1.23)                    | 0.90        | 1.01                 | (0.80-1.26)                        | 0.95        |                      |
| rs35680                |            |       |          |                                |             |                      |                                    |             |                      |
| A/A                    | 152        | 183   | 1.00     | (-)                            |             | 1.00                 | (-)                                |             |                      |
| A/G                    | 343        | 300   | 1.40     | (1.07-1.83)                    |             | 1.35                 | (1.03-1.78)                        |             |                      |
| G/G                    | 137        | 159   | 1.05     | (0.77-1.44)                    | 0.66        | 0.97                 | (0.70-1.34)                        | 0.96        |                      |
| A/G or G/G             | 480        | 459   | 1.28     | (1.00-1.65)                    | 0.05        | 1.22                 | (0.94-1.58)                        | 0.12        |                      |
| rs35679                |            |       |          |                                |             |                      |                                    |             |                      |
| G/G                    | 389        | 376   | 1.00     | (-)                            |             | 1.00                 | (-)                                |             |                      |
| G/A                    | 224        | 228   | 0.96     | (0.76-1.22)                    |             | 0.98                 | (0.77-1.25)                        |             |                      |
| A/A                    | 32         | 48    | 0.63     | (0.40-1.02)                    | 0.15        | 0.60                 | (0.37-0.97)                        | 0.14        |                      |
| G/A or A/A             | 256        | 276   | 0.91     | (0.73-1.13)                    | 0.39        | 0.91                 | (0.73-1.15)                        | 0.43        |                      |
| rs696217               |            |       |          |                                |             |                      |                                    |             |                      |
| G/G                    | 547        | 547   | 1.00     | (-)                            |             | 1.00                 | (-)                                |             |                      |
| G/T                    | 89         | 97    | 0.92     | (0.67-1.26)                    |             | 0.97                 | (0.70-1.33)                        |             |                      |
| T/T                    | 3          | 5     | 0.63     | (0.15-2.64)                    | 0.47        | 0.61                 | (0.14-2.63)                        | 0.66        |                      |
| G/T or T/T             | 92         | 102   | 0.91     | (0.67-1.23)                    | 0.53        | 0.95                 | (0.69-1.29)                        | 0.75        |                      |
| rs26802                |            |       |          |                                |             |                      |                                    |             |                      |
| T/T                    | 315        | 299   | 1.00     | (-)                            |             | 1.00                 | (-)                                |             |                      |
| T/G                    | 281        | 278   | 0.96     | (0.76-1.21)                    |             | 0.97                 | (0.77-1.23)                        |             |                      |
| G/G                    | 51         | 78    | 0.63     | (0.43-0.93)                    | 0.06        | 0.60                 | (0.40-0.89)                        | 0.05        |                      |
| T/G or G/G             | 332        | 356   | 0.89     | (0.72-1.11)                    | 0.29        | 0.89                 | (0.71-1.11)                        | 0.30        |                      |
| rs27647                |            |       |          |                                |             |                      |                                    |             |                      |
| T/T                    | 216        | 237   | 1.00     | (-)                            |             | 1.00                 | (-)                                |             |                      |
| T/C                    | 328        | 290   | 1.24     | (0.97-1.58)                    |             | 1.24                 | (0.96-1.59)                        |             |                      |
| C/C                    | 99         | 121   | 0.90     | (0.65-1.24)                    | 0.94        | 0.85                 | (0.61-1.19)                        | 0.74        |                      |
| T/C or C/C             | 427        | 411   | 1.14     | (0.90-1.43)                    | 0.27        | 1.12                 | (0.89-1.42)                        | 0.34        |                      |

**Table 4 (continued)**

| SNP                    | Alleles    | Cases | Controls | Matching Adjusted <sup>1</sup> |             |                      | Multivariate Adjusted <sup>2</sup> |             |                      |
|------------------------|------------|-------|----------|--------------------------------|-------------|----------------------|------------------------------------|-------------|----------------------|
|                        |            |       |          | Odds Ratio                     | 95% CI      | p-value <sup>3</sup> | Odds Ratio                         | 95% CI      | p-value <sup>3</sup> |
| <i>GHRL</i><br>(cont.) | rs26311    |       |          |                                |             |                      |                                    |             |                      |
|                        | G/G        | 490   | 508      | 1.00                           | (-)         |                      | 1.00                               | (-)         |                      |
|                        | G/C        | 140   | 136      | 1.08                           | (0.82-1.41) |                      | 1.12                               | (0.85-1.47) |                      |
|                        | C/C        | 9     | 8        | 1.15                           | (0.44-3.02) | 0.55                 | 1.02                               | (0.38-2.73) | 0.48                 |
|                        | G/C or C/C | 149   | 144      | 1.08                           | (0.83-1.40) | 0.56                 | 1.11                               | (0.85-1.45) | 0.44                 |
|                        | rs27498    |       |          |                                |             |                      |                                    |             |                      |
|                        | G/G        | 234   | 268      | 1.00                           | (-)         |                      | 1.00                               | (-)         |                      |
|                        | G/A        | 313   | 291      | 1.24                           | (0.98-1.57) |                      | 1.32                               | (1.03-1.68) |                      |
|                        | A/A        | 93    | 87       | 1.22                           | (0.86-1.71) | 0.12                 | 1.21                               | (0.85-1.71) | 0.10                 |
|                        | G/A or A/A | 406   | 378      | 1.24                           | (0.99-1.55) | 0.07                 | 1.29                               | (1.03-1.63) | 0.03                 |
| <i>IRS1</i>            | rs12630739 |       |          |                                |             |                      |                                    |             |                      |
|                        | A/A        | 358   | 384      | 1.00                           | (-)         |                      | 1.00                               | (-)         |                      |
|                        | A/G        | 246   | 220      | 1.21                           | (0.96-1.53) |                      | 1.22                               | (0.96-1.55) |                      |
|                        | G/G        | 36    | 45       | 0.84                           | (0.53-1.34) | 0.58                 | 0.81                               | (0.50-1.30) | 0.63                 |
|                        | A/G or G/G | 282   | 265      | 1.15                           | (0.92-1.43) | 0.23                 | 1.15                               | (0.92-1.44) | 0.23                 |
|                        | rs1801276  |       |          |                                |             |                      |                                    |             |                      |
| G/G                    | 619        | 624   | 1.00     | (-)                            |             | 1.00                 | (-)                                |             |                      |
| G/C                    | 19         | 27    | 0.70     | (0.38-1.27)                    | 0.24        | 0.74                 | (0.40-1.36)                        | 0.33        |                      |
| <i>SHC1</i>            | rs1896832  |       |          |                                |             |                      |                                    |             |                      |
|                        | A/A        | 527   | 538      | 1.00                           | (-)         |                      | 1.00                               | (-)         |                      |
|                        | A/G        | 108   | 108      | 1.03                           | (0.77-1.38) |                      | 1.02                               | (0.76-1.38) |                      |
|                        | G/G        | 6     | 5        | 1.24                           | (0.37-4.09) | 0.75                 | 1.49                               | (0.44-4.99) | 0.67                 |
|                        | A/G or G/G | 114   | 113      | 1.04                           | (0.78-1.39) | 0.79                 | 1.04                               | (0.78-1.40) | 0.76                 |
| rs4845401              |            |       |          |                                |             |                      |                                    |             |                      |
| C/C                    | 223        | 224   | 1.00     | (-)                            |             | 1.00                 | (-)                                |             |                      |
| C/G                    | 318        | 314   | 1.02     | (0.80-1.30)                    |             | 1.03                 | (0.81-1.32)                        |             |                      |
| G/G                    | 99         | 114   | 0.87     | (0.62-1.20)                    | 0.50        | 0.86                 | (0.62-1.20)                        | 0.51        |                      |
| C/G or G/G             | 417        | 428   | 0.98     | (0.78-1.23)                    | 0.86        | 0.99                 | (0.78-1.25)                        | 0.91        |                      |

<sup>1</sup>Adjusted for race, birth date, and blood draw date.

<sup>2</sup>Adjusted for race, birth date, blood draw date, adult weight change, breast cysts, family history of breast cancer, and postmenopausal hormone use.

<sup>3</sup>p-values are provided for the log-additive model, and the dominant model.

ADRB2: beta-2-adrenergic receptor gene, ADRB3: beta-3-adrenergic receptor gene, GHRL: ghrelin gene, IRS1: insulin receptor substrate 1 gene, SHC1: Src homology 2 domain-containing transforming protein 1 gene, CI: confidence interval
